# Supplementary material for: SRSF1 acts as an IFN-I-regulated cellular dependency factor decisively affecting HIV-1 post-integration steps
Source: PubMed Central journal article supplement (PMC9706209; doi:10.3389/fimmu.2022.935800), 2022-11-15
Supplement: DataSheet_1.pdf [file DataSheet_1.pdf]

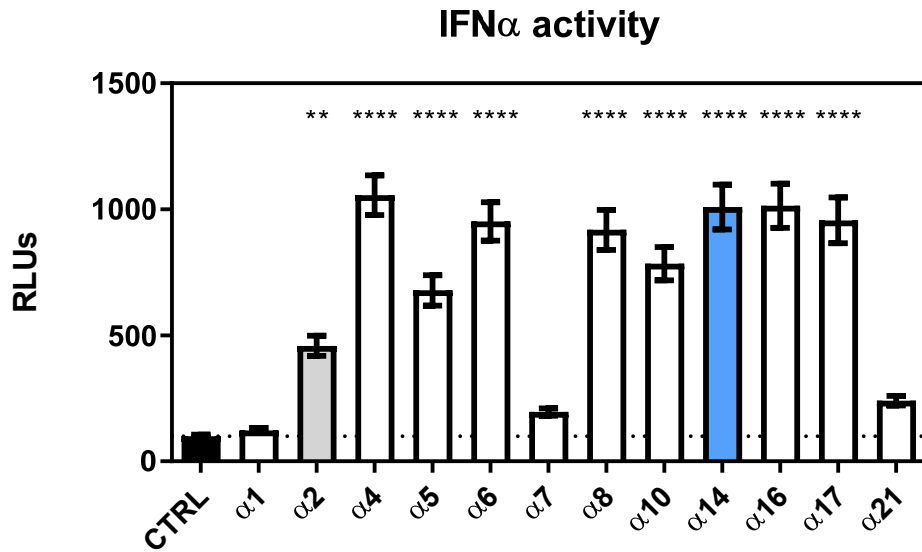

**Supplementary Figure 1: Interferon alpha subtypes differ in their ability to activate ISRE.** A luciferase reporter cell line harboring the firefly luciferase gene under the control of the ISRE promoter was stimulated with the indicated IFN $\alpha$  subtype at a concentration of 10 ng/ml. After 5 h, cells were harvested and luminescent signal measured after addition of firefly luciferase substrate. Statistical significance was determined by one-way ANOVA with Dunnett's *post hoc* test (\*  $p < 0.05$ , \*\*  $p < 0.01$ , \*\*\*  $p < 0.001$ , \*\*\*\*  $p < 0.0001$ ).

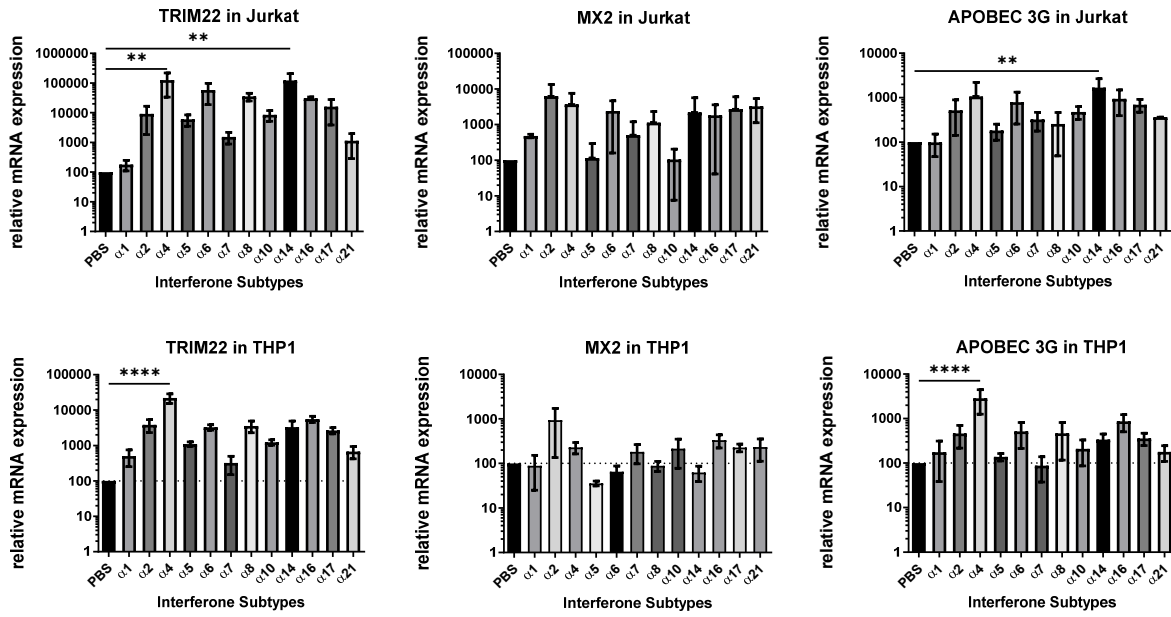

**Supplementary Figure 2: Interferon alpha subtypes differ in their ability to stimulate expression of host restriction factors.** Relative expression patterns of (A) TRIM22, (B) MX2 and (C) APOBEC 3G in Jurkat (upper panel) and THP-1 (lower panel) relative to PBS-treated cells. RT-qPCR data was normalized to relative beta actin expression. Experiments were performed in triplicates except for THP-1 IFN $\alpha$ 21 (n=2) for all ISGs and IFN $\alpha$ 7 (n=2) for Mx2 and for Jurkat IFN $\alpha$ 8 (n=2) for all ISGs, IFN $\alpha$ 1 (n=2) for Mx2 and IFN $\alpha$ 21 (n=2) for APOBEC3G. Significance levels were determined using a one-way ANOVA followed by Dunnett's *post hoc* test and are given as follows: \*p<0.05, \*\*p<0.01, \*\*\*p<0.001.

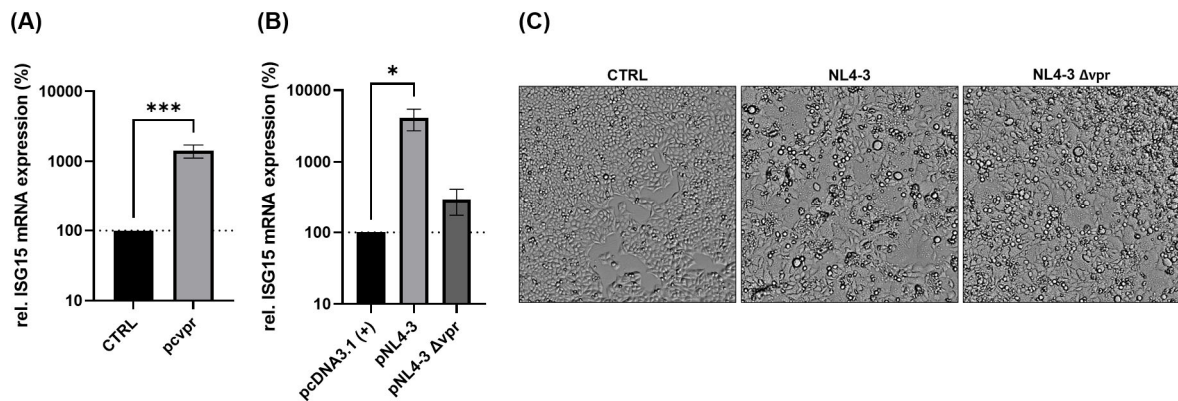

**Supplementary Figure 3 - The HIV-1 accessory protein Vpr induces strong ISG15 expression.**

HEK293T cells were transfected with **(A)** subgenomic expression plasmid encoding the HIV-1 accessory protein Vpr (unpaired, two-sided Welch's t-test, \*\*\*  $p < 0.001$ ) or **(B)** with the full length HIV-1 proviral plasmid DNA clone (NL4-3) or the Vpr deficient derivate (NL4-3  $\Delta$ vpr). Cells were rinsed with PBS 48 h (A) or 72 h (B) post transfection and subjected to RNA isolation. RT-qPCR was performed to evaluate ISG15 expression levels. Statistical significance was determined by one-way ANOVA with Dunnett's post hoc test (\*  $p < 0.05$ ) **(C)** TZM-bl cells were seeded into 96-well plates and infected using the previously harvested supernatant from (B). 48 h post infection syncytia formation was qualitatively analyzed to monitor the production of infectious HIV-1.

(A)

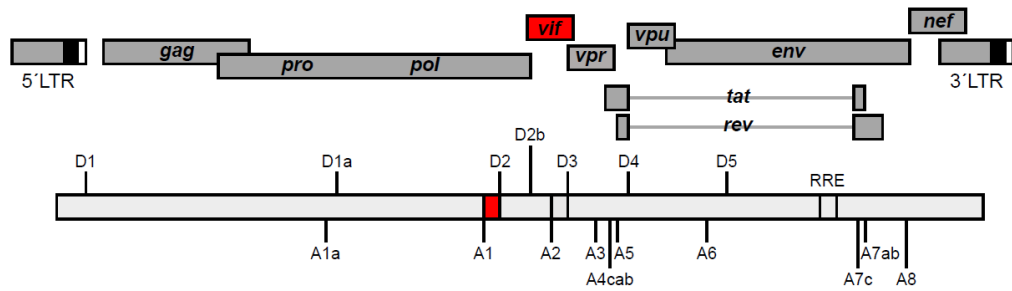

(B)

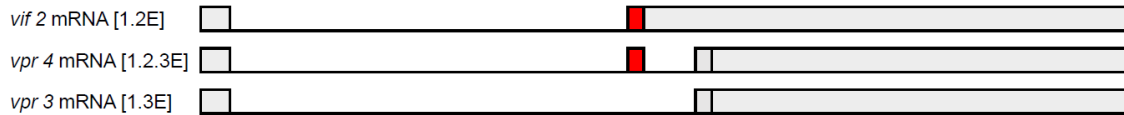

(C)

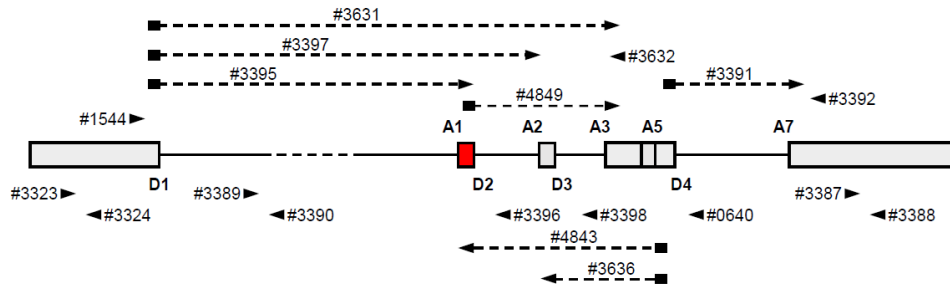

**Supplementary Figure 4: HIV-1 NL4-3 genome.** a) HIV-1 genome with open reading frames (ORFs) and long terminal repeats (LTRs). 5'- and 3'-splice sites are indicated as well as the Rev response element (RRE). *Vif* Exon and ORF is highlighted in red. b) *Vif* and *Vpr* mRNAs are spliced from 5'-ss D1 to 3'-ss A1 and 5'-ss D1 to 3'-ss A2 respectively, harboring the non-coding leader Exons 2 and 3. AUG-containing Introns 2 and 3 are contained respectively. c) Binding sites of primers for RT-qPCR and RT-PCR. Grey boxes indicate Exons, while straight lines indicate Introns. Black arrowheads indicate primers. Primers with black rectangle and black arrowhead connected via dashed line indicate Exon-junction primers.

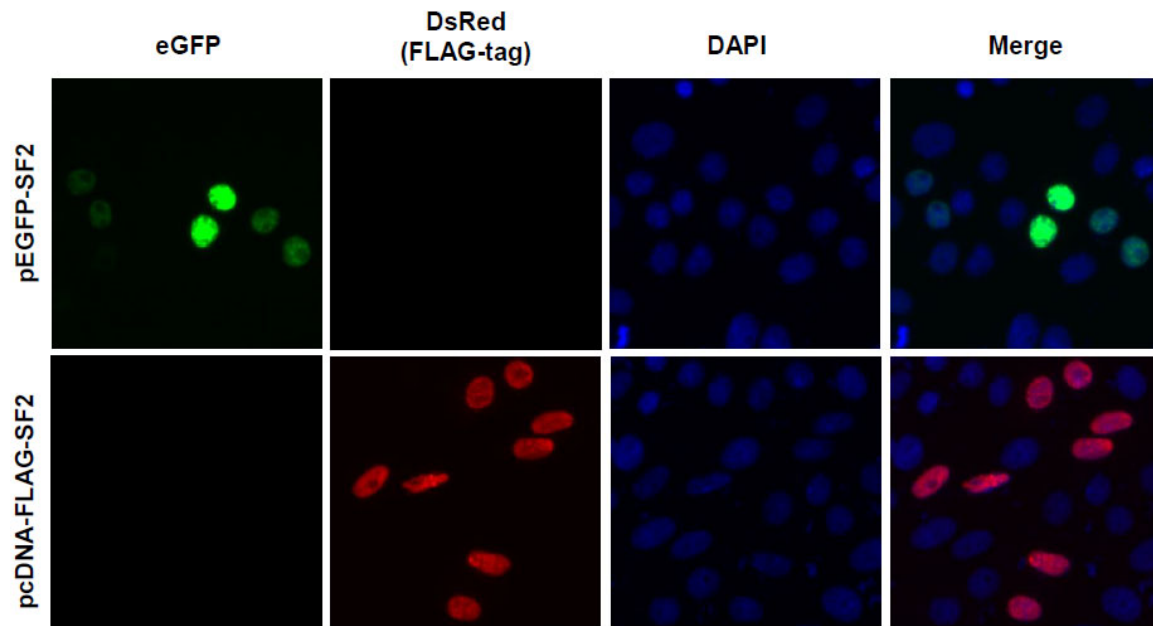

**Supplementary Figure 5 - Immunofluorescence staining confirms expression and nuclear localization of exogenously transfected SRSF1.** Vero cells were transiently transfected with pEGFP-SF2 (Phair and Misteli, 2000) or pcDNA-FLAG-SF2 (Huang et al., 2017). Cells were fixed 24 h post transfection and nuclei were stained using DAPI. Immunofluorescence microscopy of FLAG-tagged SRSF1 or EGFP-SRSF1 fusion proteins were performed to confirm expression and nuclear localization of exogenously transfected SRSF1.
